# Supplementary material for: Effect of biologics in the level of cytokines in the synovial fluid of patients with ankylosing spondylitis
Source: PubMed Central journal article supplement — Korean J Intern Med. 2019 Dec 16;35(2):465–73. doi: 10.3904/kjim.2018.364 (PMC7060997; doi:10.3904/kjim.2018.364), 2019-12-16
Supplement: kjim-2018-364-suppl1.pdf [file kjim-2018-364-suppl1.pdf]

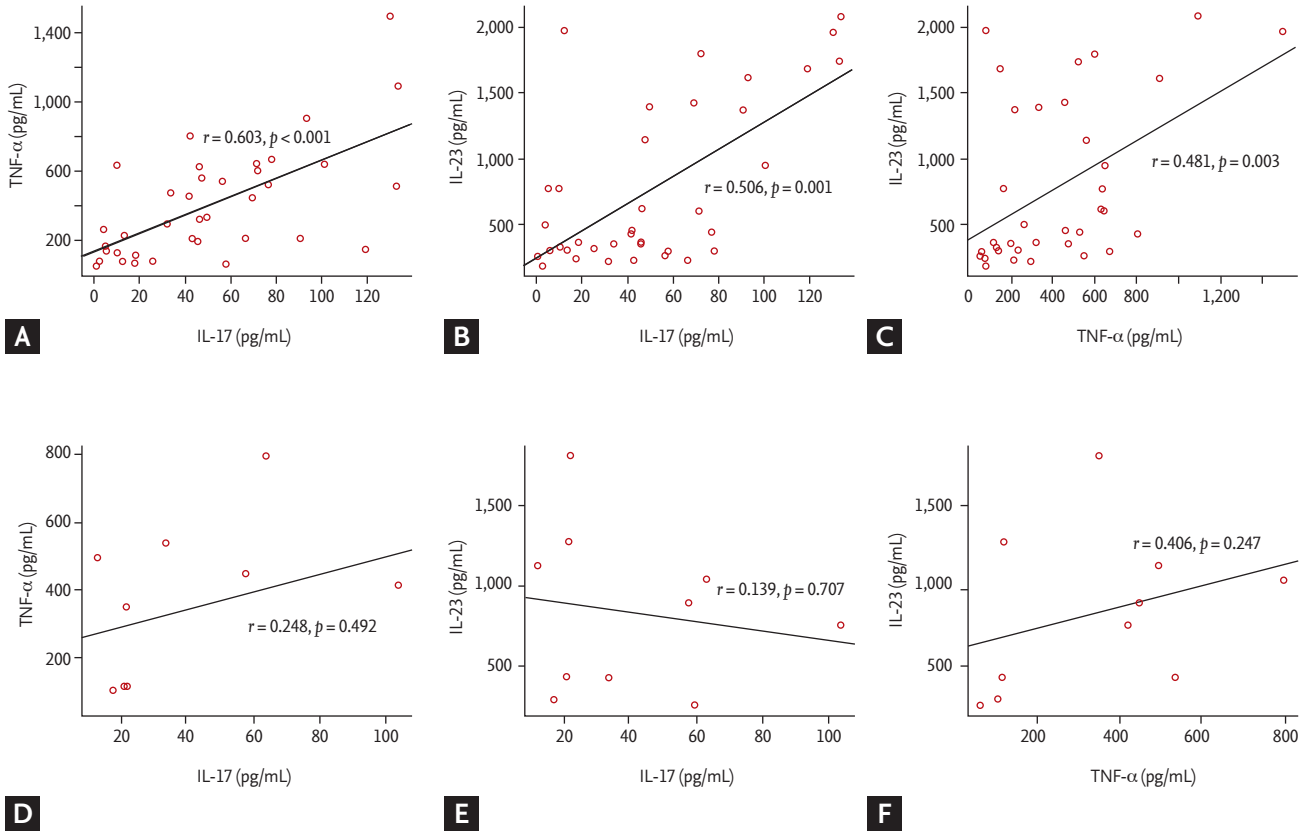

**Supplementary Fig. 1.** Correlations among (A, B, C) tumor necrosis factor- $\alpha$  (TNF- $\alpha$ ), interleukin 17 (IL-17), and IL-23 in the nonbiologics (n = 37) and (D, E, F) biologics groups (n = 10) in patients with rheumatoid arthritis.
