# Supplementary material for: Effect of biologics in the level of cytokines in the synovial fluid of patients with ankylosing spondylitis
Source: PubMed Central journal article supplement — Korean J Intern Med. 2019 Dec 16;35(2):465–73. doi: 10.3904/kjim.2018.364 (PMC7060997; doi:10.3904/kjim.2018.364), 2019-12-16
Supplement: kjim-2018-364-suppl3.pdf [file kjim-2018-364-suppl3.pdf]

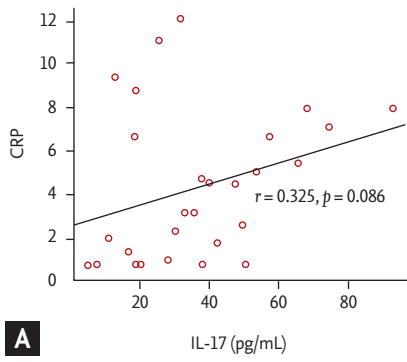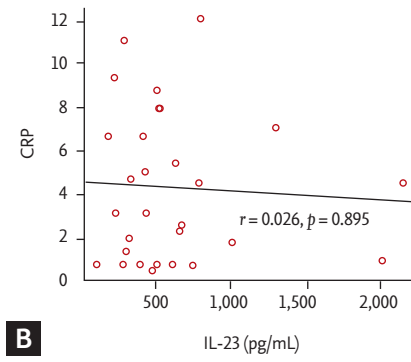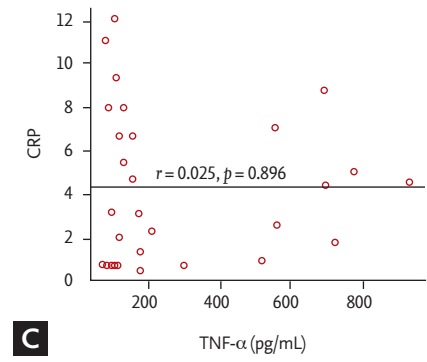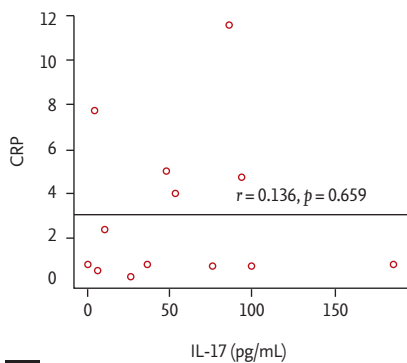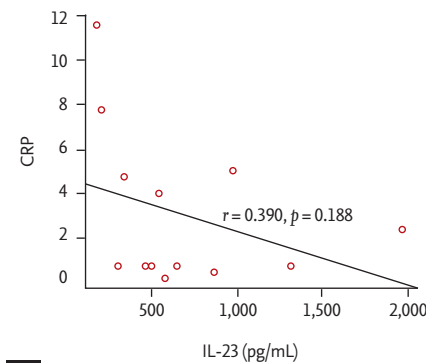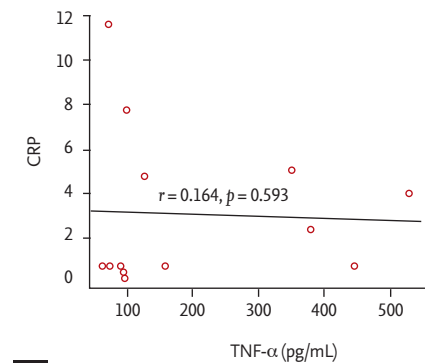

**Supplementary Figure 3.** Correlations between C-reactive protein (CRP) and (A, B, C) cytokines in the nonbiologics (n = 29) and (D, E, F) biologics groups (n = 13) in patients with ankylosing spondylitis. IL, interleukin; TNF- $\alpha$ , tumor necrosis factor- $\alpha$ .
